# Supplementary material for: Understanding human salivary esterase activity and its variation under wine consumption conditions
Source: Royal Society of Chemistry journal article supplement (doi:10.1039/d0ra04624h), 2020-01-01
Supplement: d0ra04624h1.pdf [file d0ra04624h1.pdf]

## 1 Supplementary Material

2

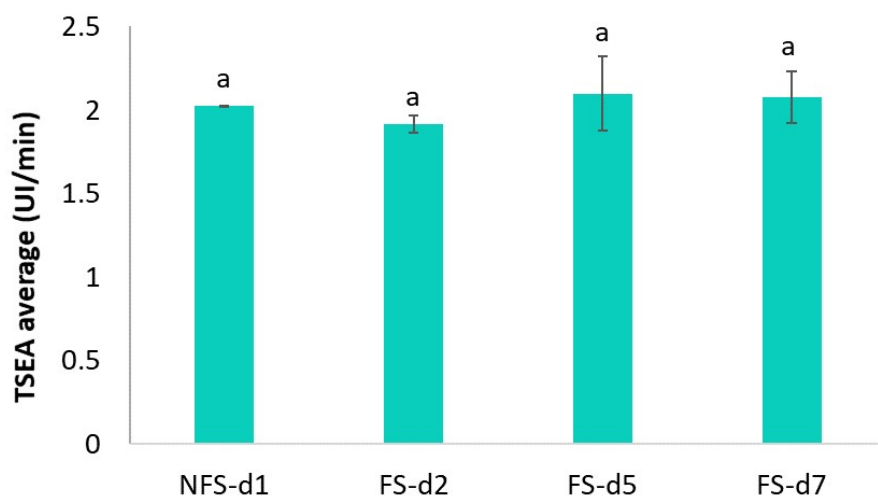

3

4 **Figure 1S.** Average values of TSEA measurements obtained in a non- frozen (NFS-d1) and  
5 frozen saliva during 2 (FS-d2), 5 (FS-d5) and 7 (FS-d7) days. Error bars represent  $\pm$  SD. The  
6 letters above the bars denote statistical significant differences ( $p < 0.05$ ) from Tukey test.

7

8

9

10

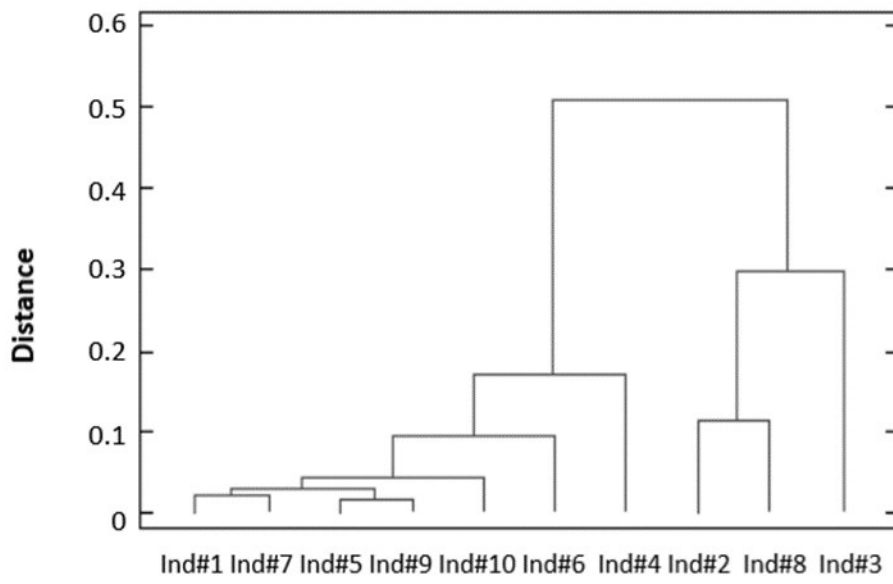

11  
 12 **Figure 2S:** Hierarchical cluster analysis performed with TSEA average values from 10  
 13 individuals. Method based on single linkage (nearest neighbour) and squared Euclidean  
 14 distance.

15  
 16  
 17  
 18  
 19  
 20  
 21  
 22  
 23

24 **Table 1S.** Salivary parameters (average values) determined for the participants of the study  
25 (n=10).

| <b>Individual</b> | <b>Flow<sup>a</sup></b> | <b>pH</b> | <b>TPC<sup>b</sup></b> |
|-------------------|-------------------------|-----------|------------------------|
| <b>Ind#1</b>      | 3.22                    | 7.13      | 509.25                 |
| <b>Ind#2</b>      | 1.49                    | 7.25      | 680.08                 |
| <b>Ind#3</b>      | 2                       | 7.17      | 1460.33                |
| <b>Ind#4</b>      | 2.39                    | 7.27      | 1450.17                |
| <b>Ind#5</b>      | 0.7                     | 6.87      | 1481.58                |
| <b>Ind#6</b>      | 0.71                    | 6.76      | 944.33                 |
| <b>Ind#7</b>      | 0.99                    | 7.07      | 1441.08                |
| <b>Ind#8</b>      | 3.25                    | 7.42      | 543.58                 |
| <b>Ind#9</b>      | 1.94                    | 7.28      | 955.33                 |
| <b>Ind#10</b>     | 1.52                    | 7.1       | 1105.42                |

26 <sup>a</sup>Flow (mL/min)

27 <sup>b</sup>TPC: total protein concentration (µg/mL).

28

29

30

31
